# Supplementary material
Source: PubMed Central journal article supplement (PMC1748182)

**A**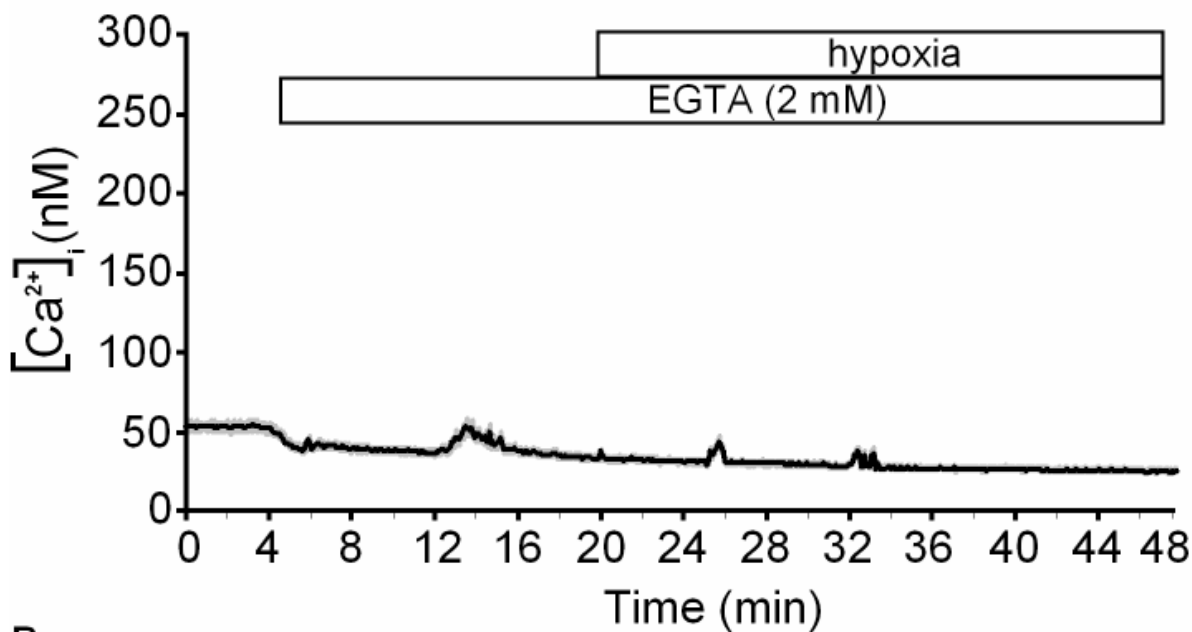**B**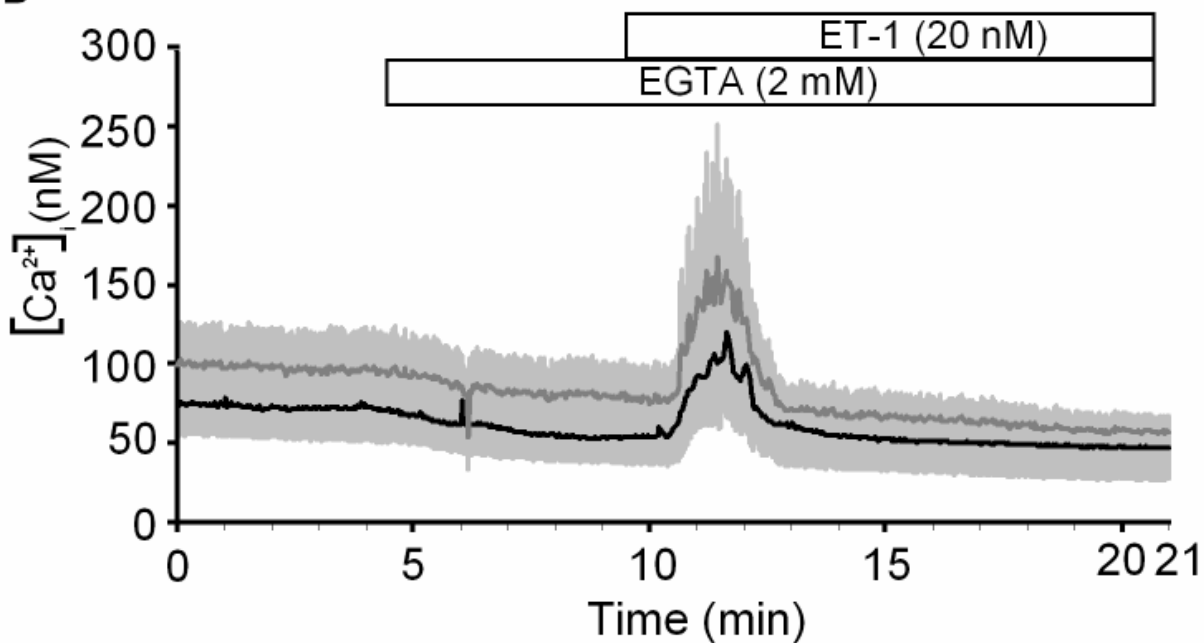

Supplement: pnas_0606728103_5.pdf [file pnas_0606728103_5.pdf]
